# Supplementary material for: Effect of Al2O3 and ZrO2 Filler Material on the Microstructural, Thermal and Dielectric Properties of Borosilicate Glass-Ceramics
Source: MDPI journal article supplement (doi:10.3390/mi14030595), 2023-03-02
Supplement: s1 [file s1]

# Supplementary Materials: Effect of Al<sub>2</sub>O<sub>3</sub> and ZrO<sub>2</sub> Filler Material on the Microstructural, Thermal and Dielectric Properties of Borosilicate Glass-Ceramics

Dilara Arıbuğa <sup>1,2</sup>, Oğuz Karaahmet <sup>3,4</sup> Özge Balcı-Çağırır <sup>2,5</sup> and Buğra Çiçek <sup>4,\*</sup>

<sup>1</sup> Graduate School of Sciences and Engineering, Koç University, 34450 Istanbul, Turkey

<sup>2</sup> Koç University Boron and Advanced Materials Application and Research Center, 34450 Istanbul, Turkey

<sup>3</sup> Akcoat R&D Center, 2nd IZ, 54300 Sakarya, Turkey

<sup>4</sup> Department of Metallurgical and Materials Engineering, Yıldız Technical University, 34210 Istanbul, Turkey

<sup>5</sup> Department of Chemistry, Koç University, 34450 Istanbul, Turkey

\* Correspondence: bcicek@yildiz.edu.tr

**Table S1.** PDF card numbers and their corresponding crystal structures.

| PDF card number | Chemical formula                  | Mineral name | Crystal structure |
|-----------------|-----------------------------------|--------------|-------------------|
| 9007635         | Al <sub>2</sub> O <sub>3</sub>    | Corundum     | Hexagonal         |
| 9006525         | Al <sub>2</sub> O <sub>5</sub> Si | Silimanite   | Orthorhombic      |
| 8104264         | ZrO <sub>2</sub>                  | -            | Monoclinic        |
| 9000713         | Al <sub>2</sub> O <sub>5</sub> Si | Silimanite   | Orthorhombic      |

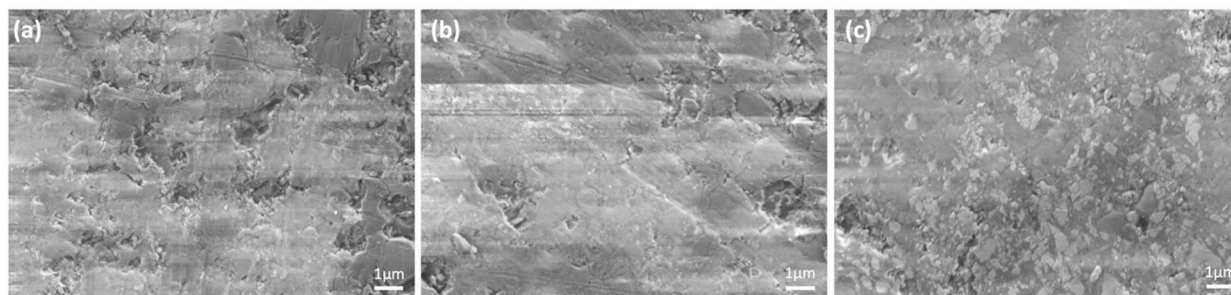

**Figure S1.** SEM images of sintered glass ceramics at 20.00 KX a) 30Al-O, b) 40Al-O, c) 50Al-O.

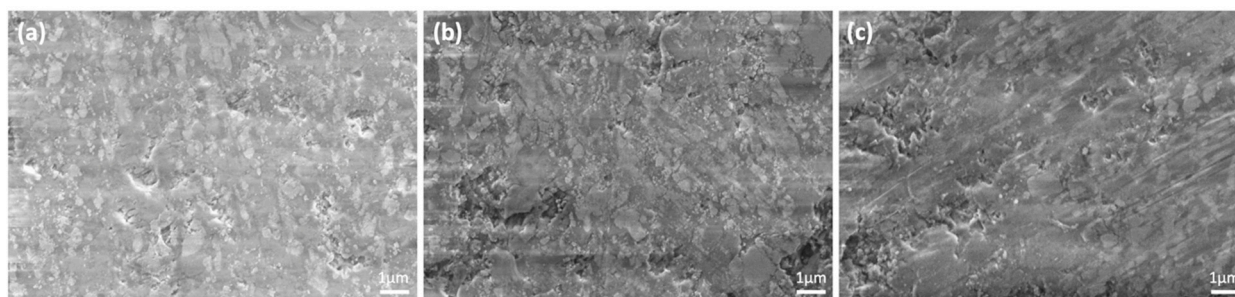

**Figure S2.** SEM images of sintered glass ceramics at 20.00 KX a) 30Zr-Ar, b) 40Zr-Ar, c) 50Zr-Ar.

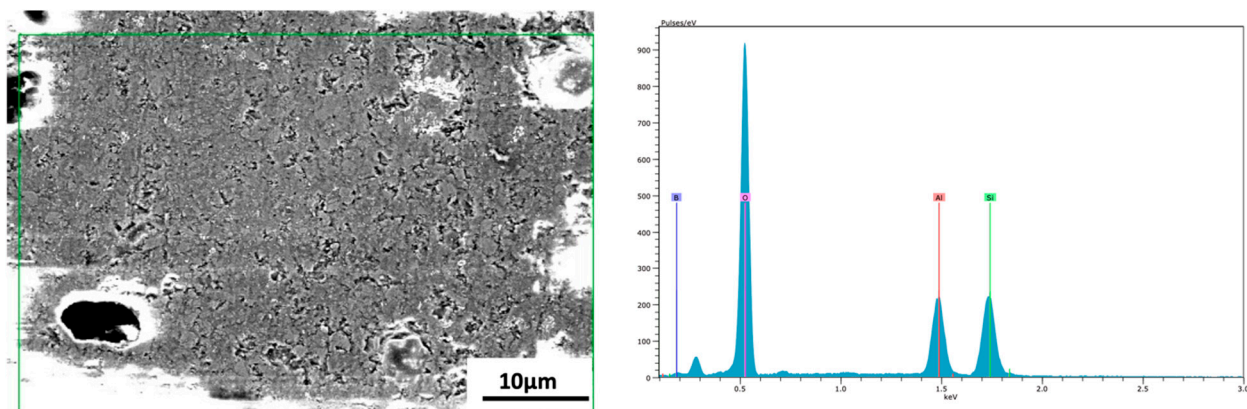

Figure S3. EDS analysis of the 30Al-O sample.

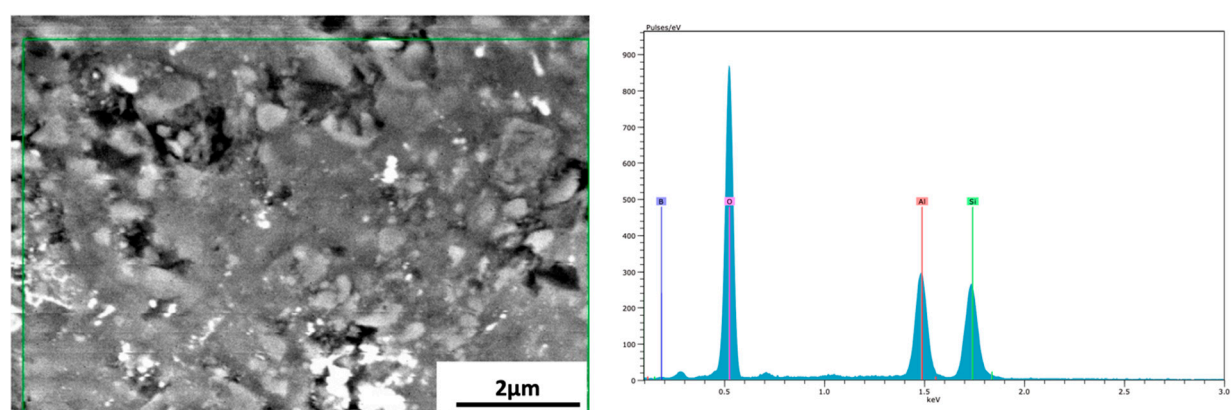

Figure S4. EDS analysis of the 40Al-O sample.

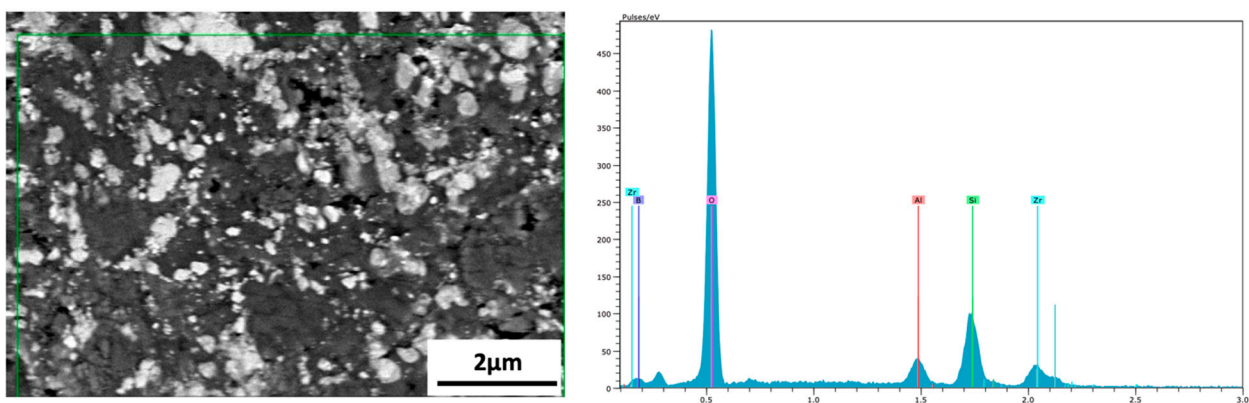

Figure S5. EDS analysis of the 30Zr-Ar sample.



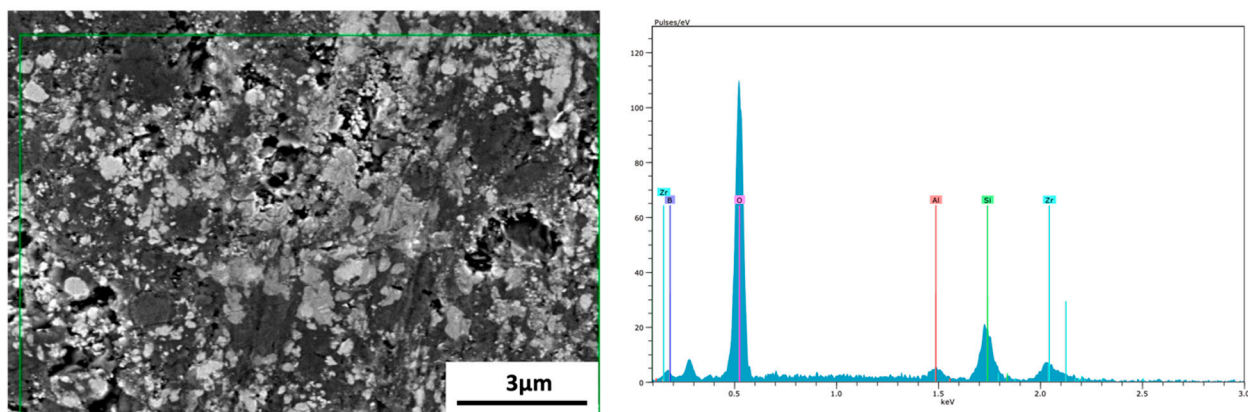

**Figure S6.** EDS analysis of the 40Zr-Ar sample.

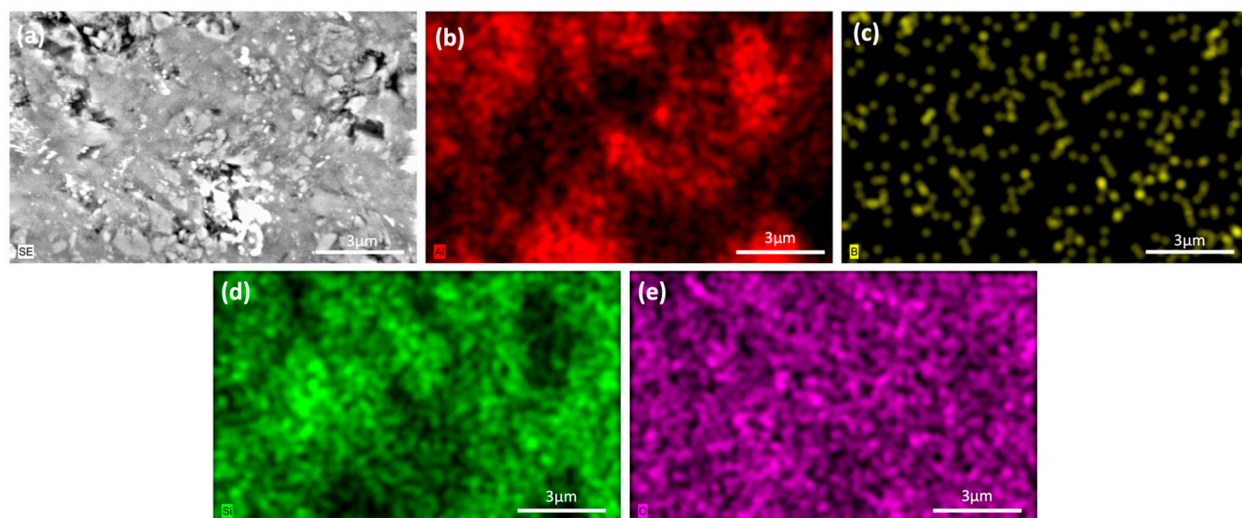

**Figure S7.** SEM/EDX analyses of the 40Al-O sample (a) SEM image, (b) EDX mapping of Al, (c) EDX mapping of B, (d) EDX mapping of Si, (e) EDX mapping of O.

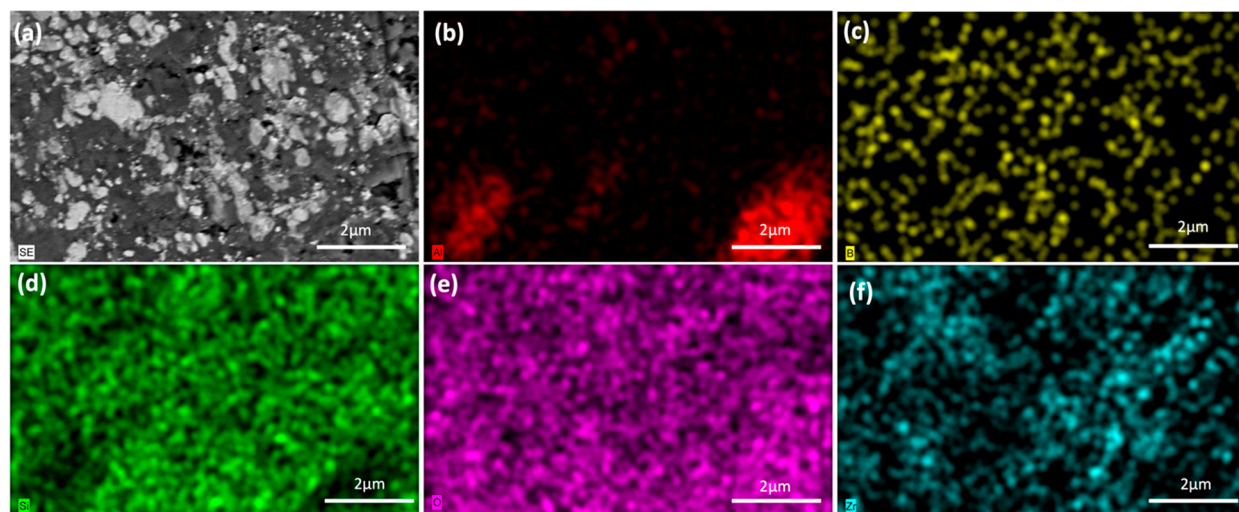

**Figure S8.** SEM/EDX analyses of the 30Zr-Ar sample (a) SEM image, (b) EDX mapping of Al, (c) EDX mapping of B, (d) EDX mapping of Si, (e) EDX mapping of O, (f) EDX mapping of Zr.
